# Supplementary material for: Novel meta-benzothiazole and benzimidazole functionalised POCOP-Ni(ii) pincer complexes as efficient catalysts in the production of diarylketones
Source: Royal Society of Chemistry journal article supplement (doi:10.1039/d1nj01348c), 2021-01-01
Supplement: d1nj01348c1.pdf [file d1nj01348c1.pdf]

## Supplementary Information for:

### Synthesis of Novel *meta*-Benzothiazole and Benzimidazole Functionalised Ni(II)-POCOP Pincer Complexes.

#### Efficient Catalysts in the Production of Diarylketones

Antonio A. Castillo-García,<sup>a</sup> Lucero González-Sebastián,<sup>b,\*</sup> Leticia Lomas-Romero,<sup>b</sup> Simon Hernandez-Ortega,<sup>a</sup> Ruben A. Toscano<sup>a</sup> and David Morales-Morales<sup>a,\*</sup>

<sup>a</sup>*Instituto de Química, Universidad Nacional Autónoma de México, Circuito Exterior, Ciudad Universitaria, Ciudad de México, C.P. 04510, México.* <sup>b</sup>*Departamento de Química, Universidad Autónoma Metropolitana-Iztapalapa, Av. San Rafael Atlixco No. 186, Ciudad de México, C.P. 09340, México.*

\*Corresponding author. Tel.: +52 55 56224514; fax: +52 55 56162217.

E-mail address: damor@unam.mx (D. Morales-Morales)

#### INDEX

|      |                                                                                                                   |       |
|------|-------------------------------------------------------------------------------------------------------------------|-------|
| I.   | <b><sup>1</sup>H and <sup>13</sup>C{<sup>1</sup>H} NMR spectra of proligands (P1 and P2)</b>                      | SI-2  |
| II.  | <b><sup>31</sup>P{<sup>1</sup>H} NMR spectra of unpurified phosphinite pincer ligands (L1a, L1b, L2a and L2b)</b> | SI-4  |
| III. | <b><sup>1</sup>H, <sup>13</sup>C{<sup>1</sup>H} and <sup>31</sup>P{<sup>1</sup>H} NMR spectra of complex 1a</b>   | SI-6  |
| IV.  | <b><sup>1</sup>H, <sup>13</sup>C{<sup>1</sup>H} and <sup>31</sup>P{<sup>1</sup>H} NMR spectra of complex 1b</b>   | SI-8  |
| V.   | <b><sup>1</sup>H, <sup>13</sup>C{<sup>1</sup>H} and <sup>31</sup>P{<sup>1</sup>H} NMR spectra of complex 2a</b>   | SI-10 |
| VI.  | <b><sup>1</sup>H, <sup>13</sup>C{<sup>1</sup>H} and <sup>31</sup>P{<sup>1</sup>H} NMR spectra of complex 2b</b>   | SI-12 |
| VII. | <b><sup>1</sup>H and <sup>13</sup>C NMR data for compounds 3a -3p</b>                                             | SI-13 |

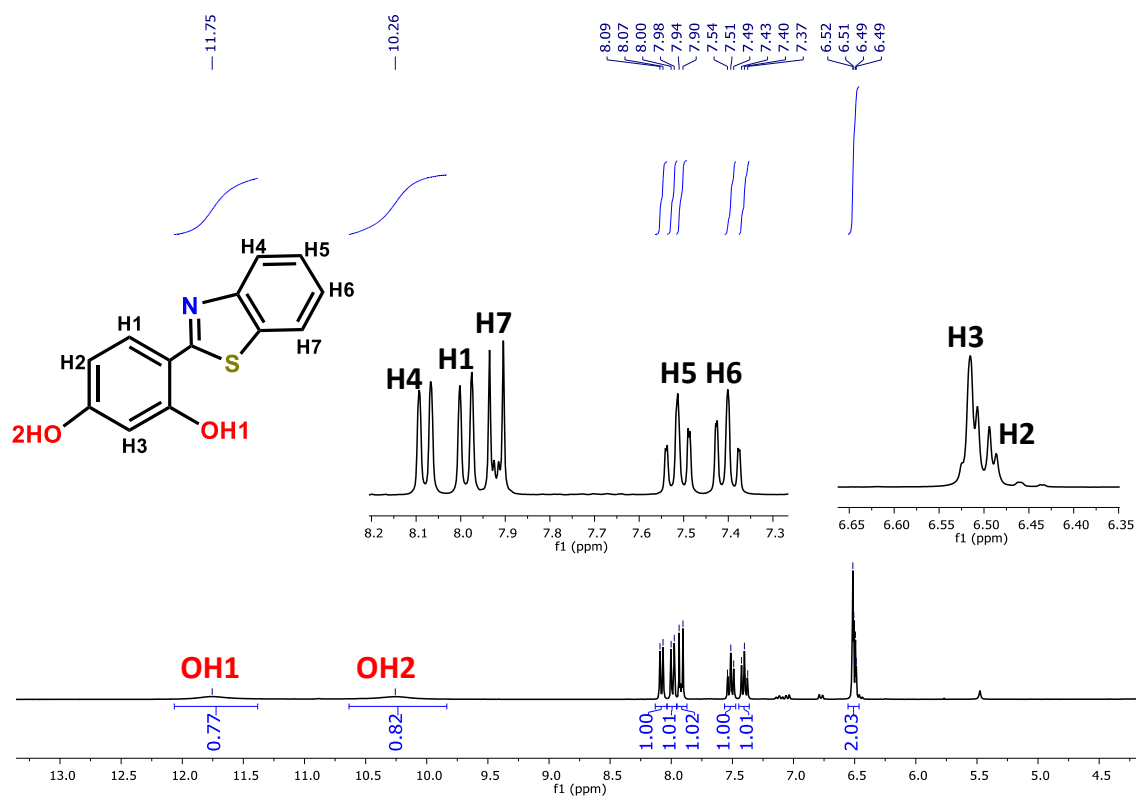

Figure SI1.  $^1\text{H}$  NMR spectrum of P1

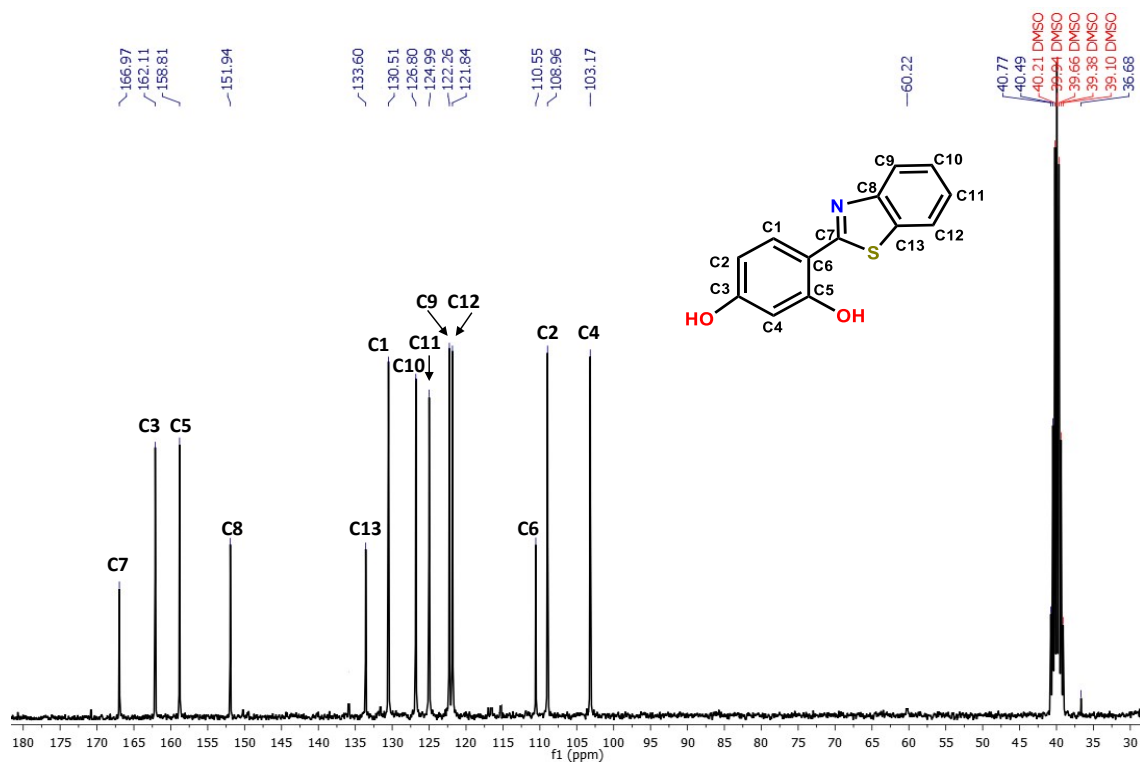

Figure SI2.  $^{13}\text{C}\{^1\text{H}\}$  NMR spectrum of P1

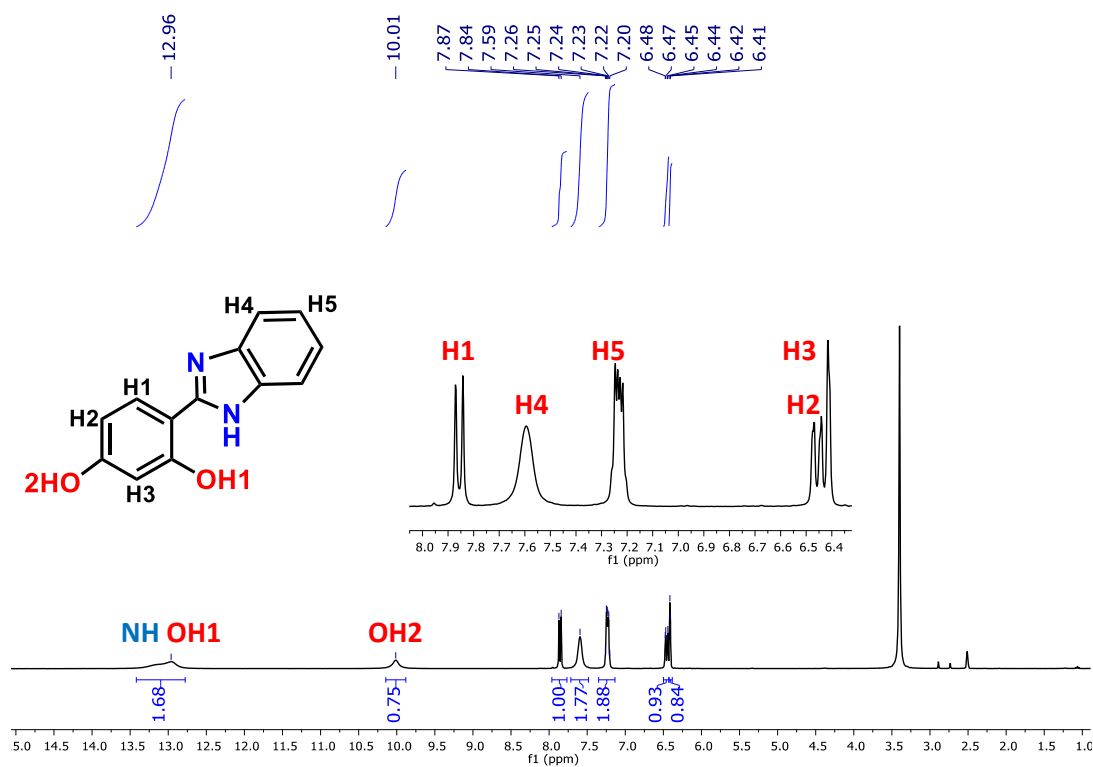

Figure SI3.  $^1\text{H}$  NMR spectrum of P2

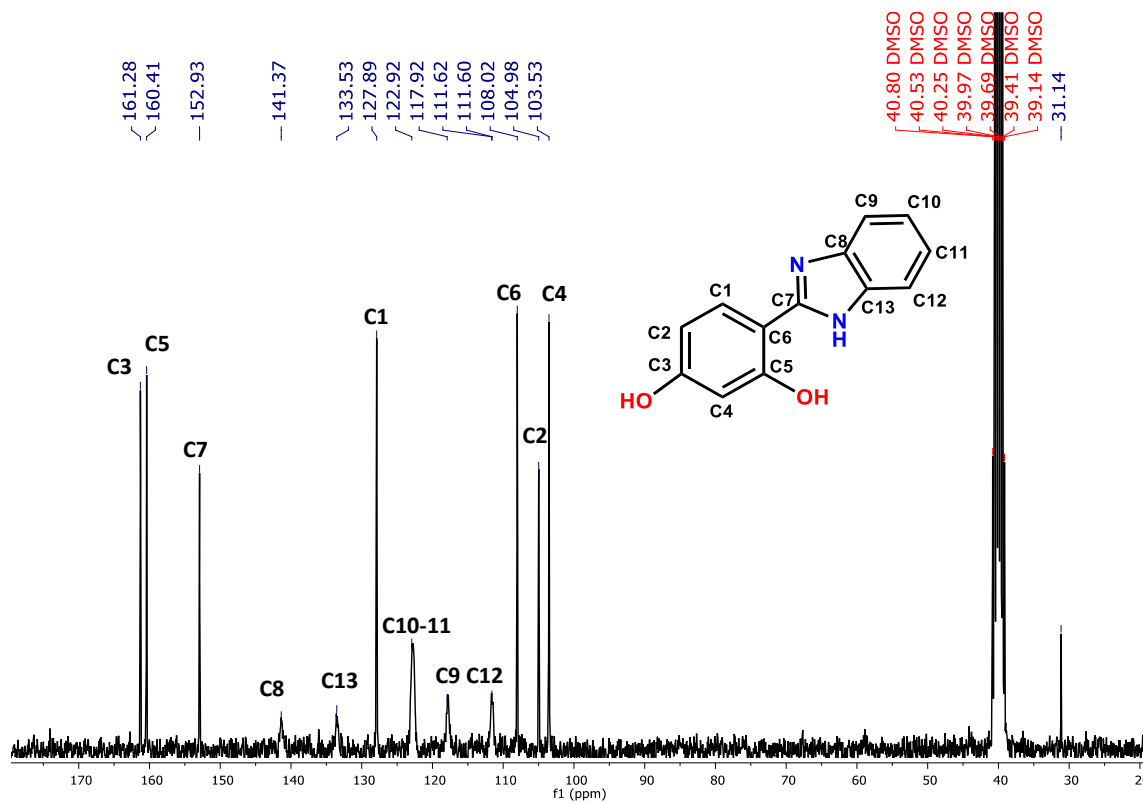

Figure SI4.  $^{13}\text{C}\{^1\text{H}\}$  NMR spectrum of **P2**

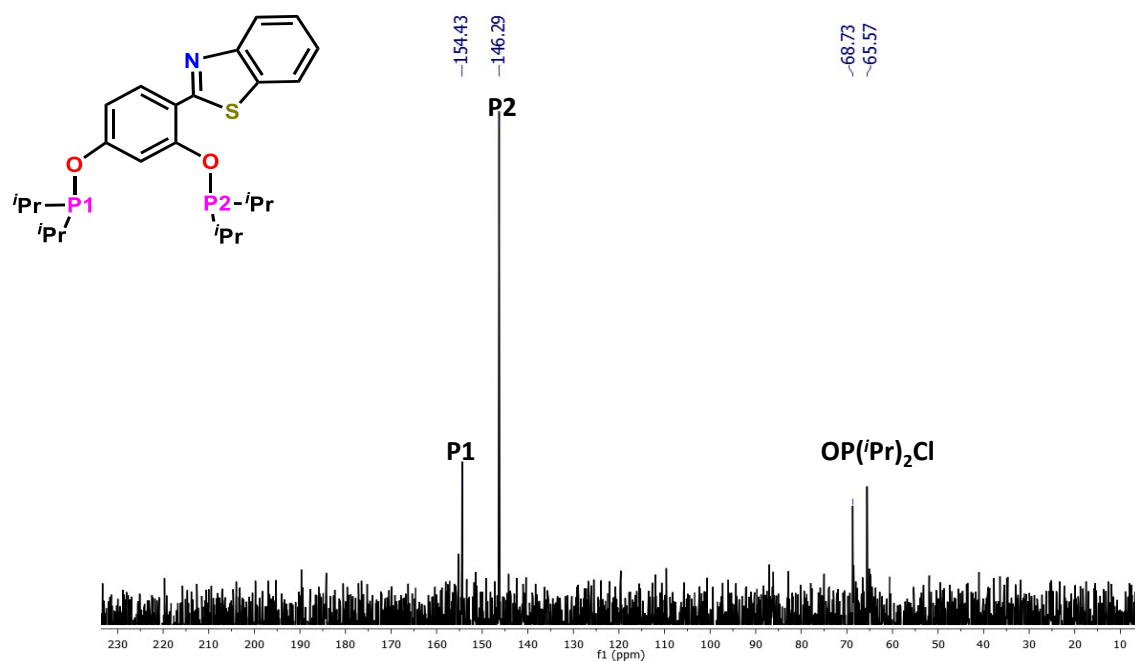

Figure SI5.  $^{31}\text{P}\{^1\text{H}\}$  NMR spectrum of **L1a**

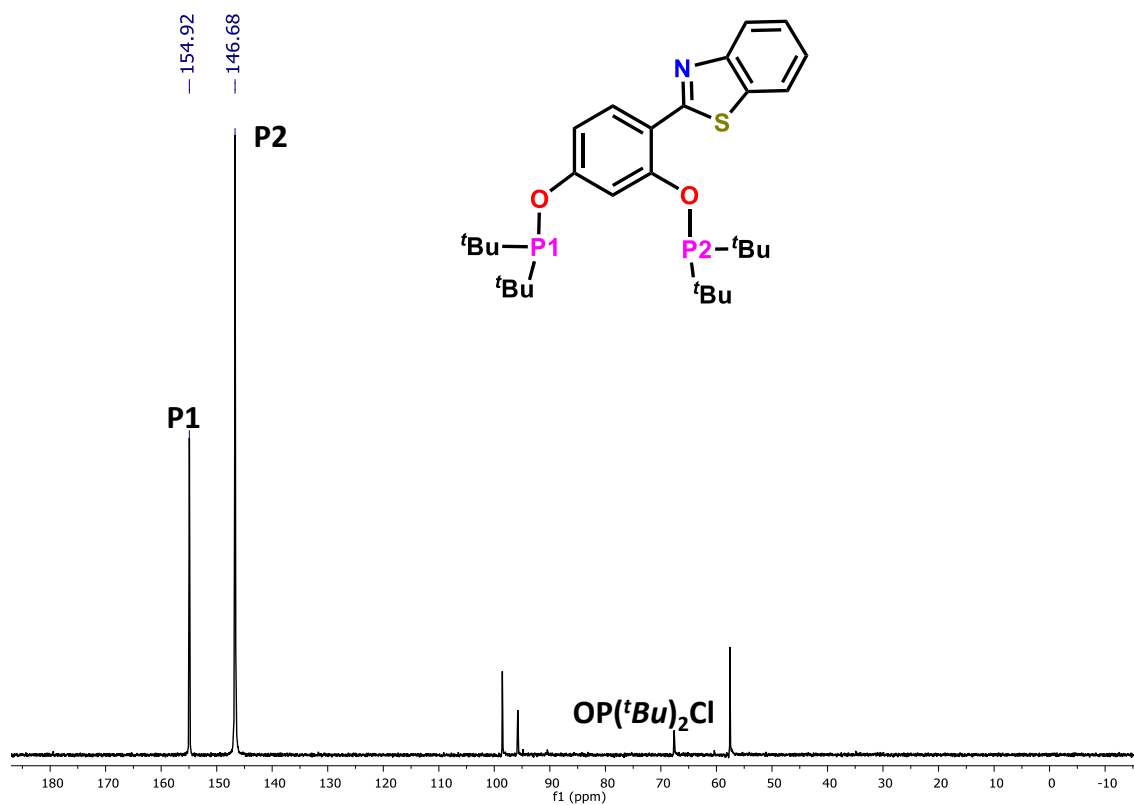

Figure SI6.  $^{31}\text{P}\{^1\text{H}\}$  NMR spectrum of **L1b**

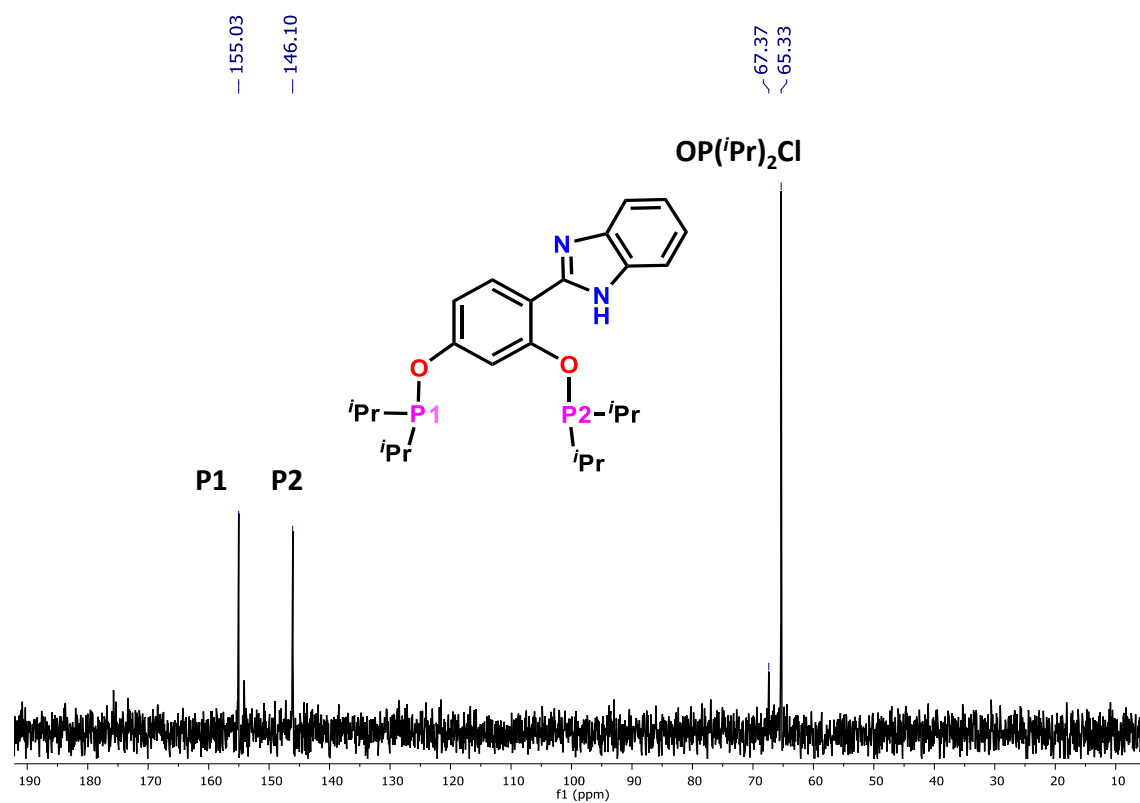

Figure SI7.  $^{31}\text{P}\{^1\text{H}\}$  NMR spectrum of **L2a**

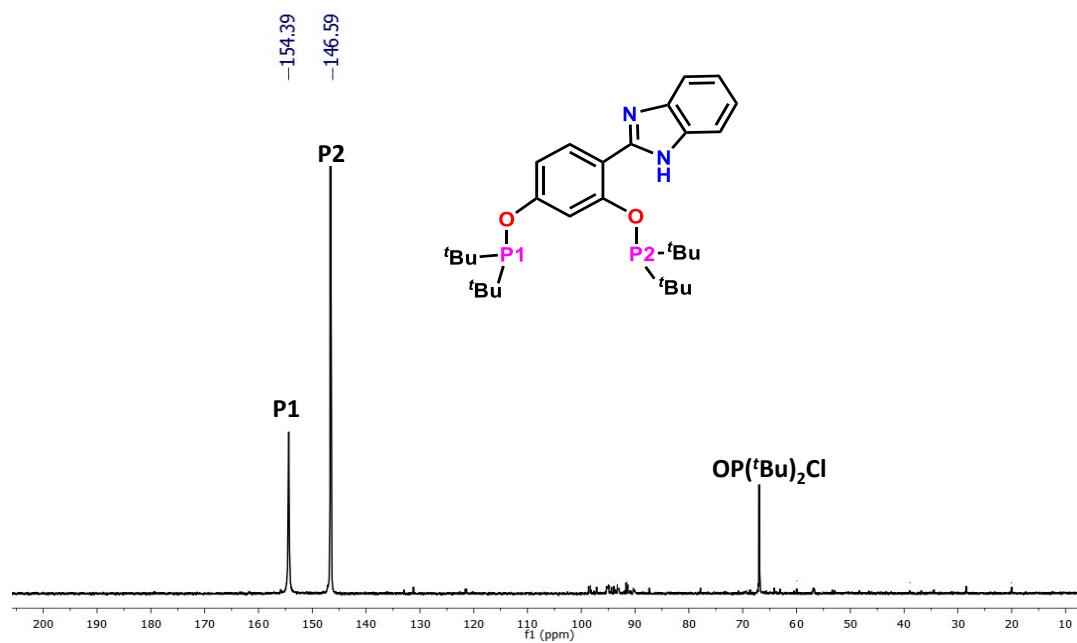

Figure SI8.  $^{31}\text{P}\{^1\text{H}\}$  NMR spectrum of **L2b**

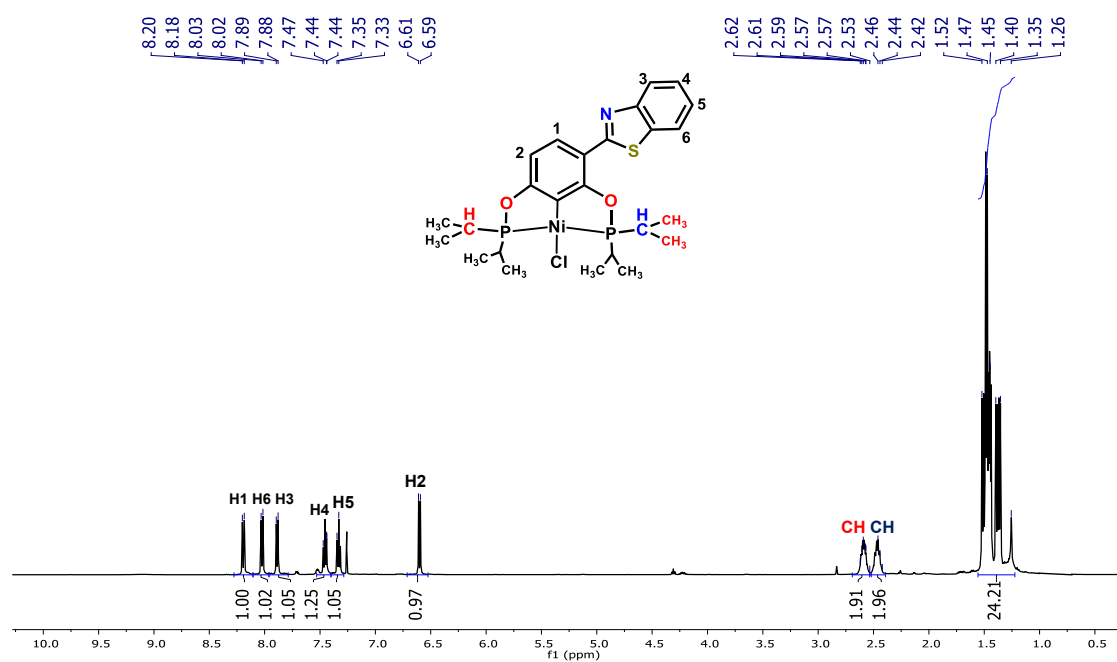

Figure SI9.  $^1\text{H}$  NMR spectrum of **1a**

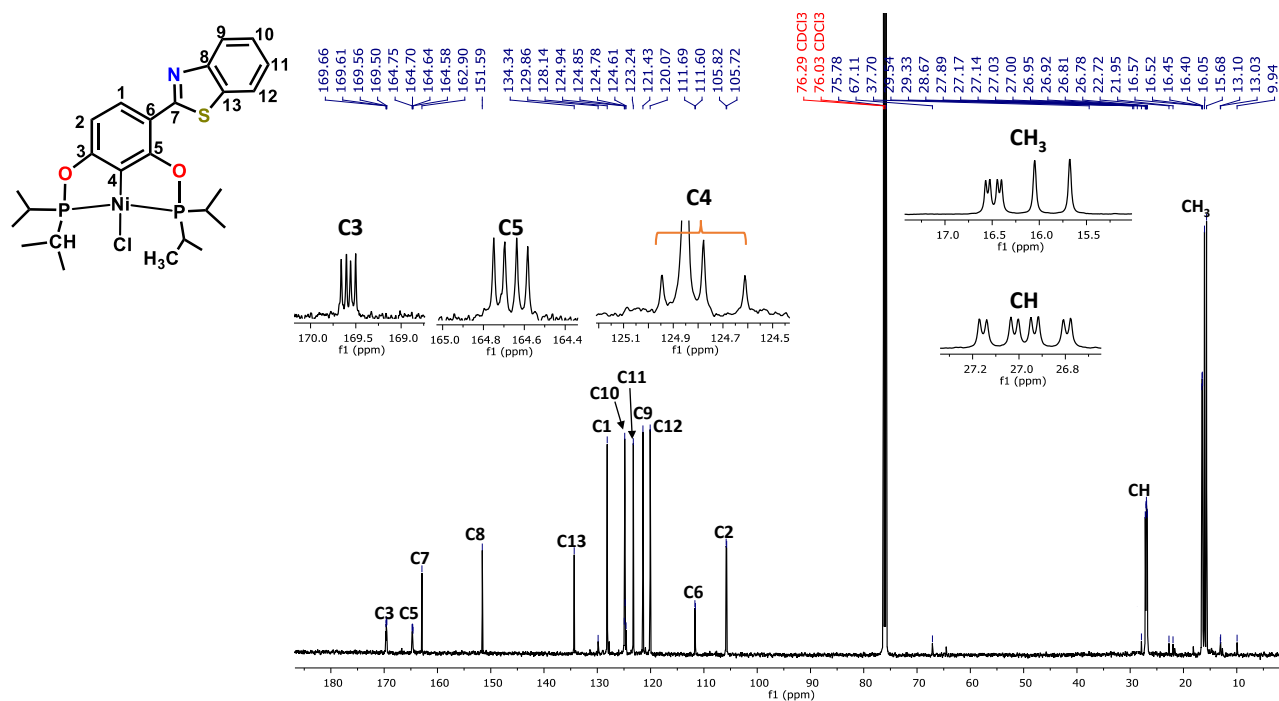

Figure SI10.  $^{13}\text{C}\{^1\text{H}\}$  NMR spectrum of **1a**

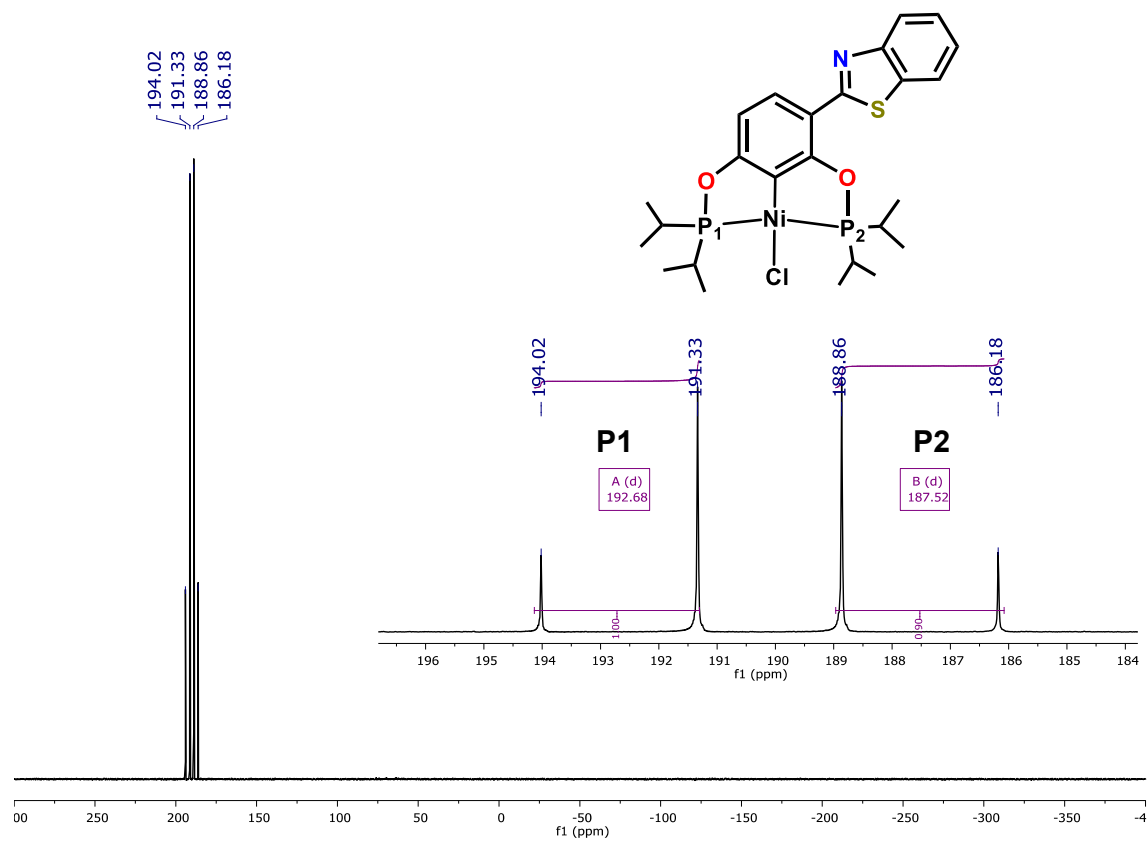

Figure SI11. <sup>31</sup>P{<sup>1</sup>H} spectrum of **1a**

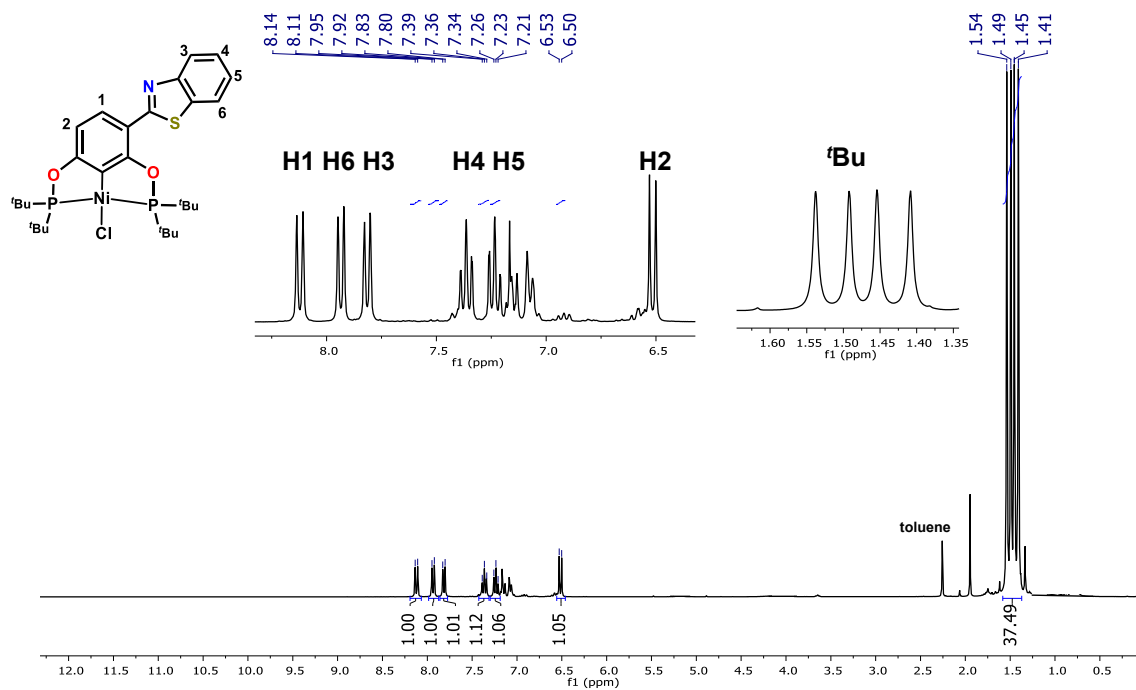

Figure SI12.  $^1\text{H}$  NMR spectrum of **1b**

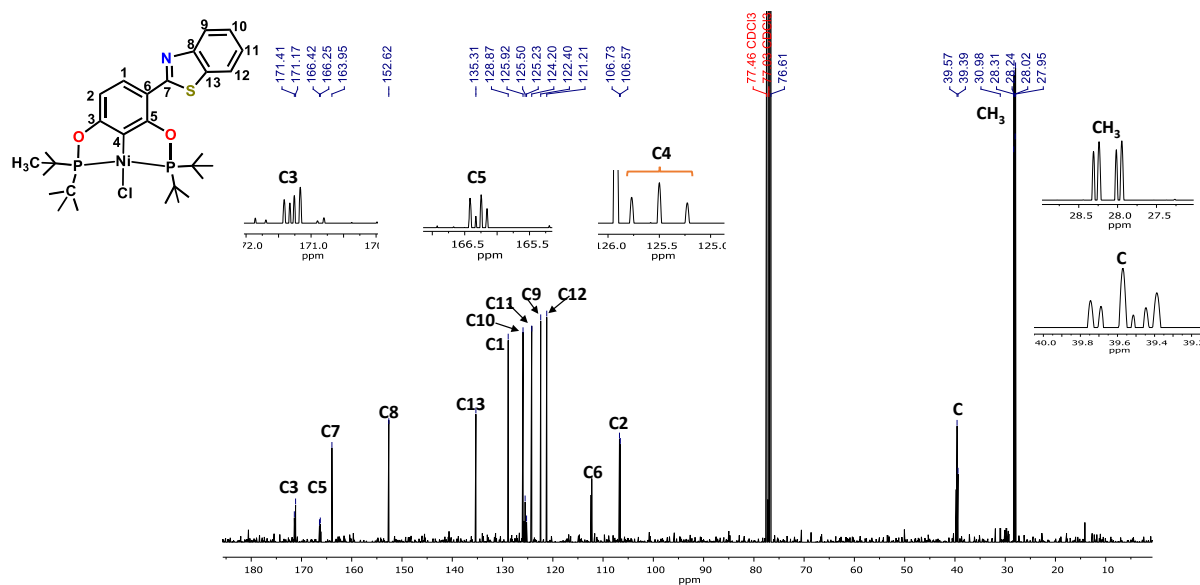

Figure SI13.  $^{13}\text{C}\{^1\text{H}\}$  NMR spectrum of **1b**



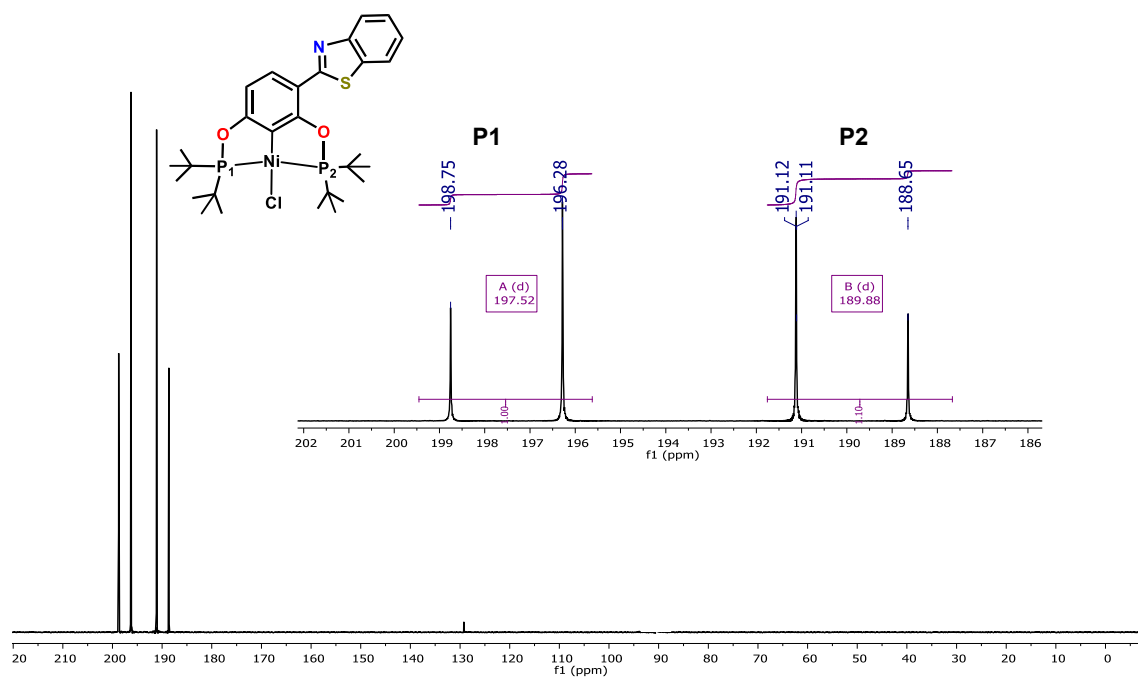

Figure SI14.  $^{31}\text{P}\{^1\text{H}\}$  NMR spectrum of **1b**

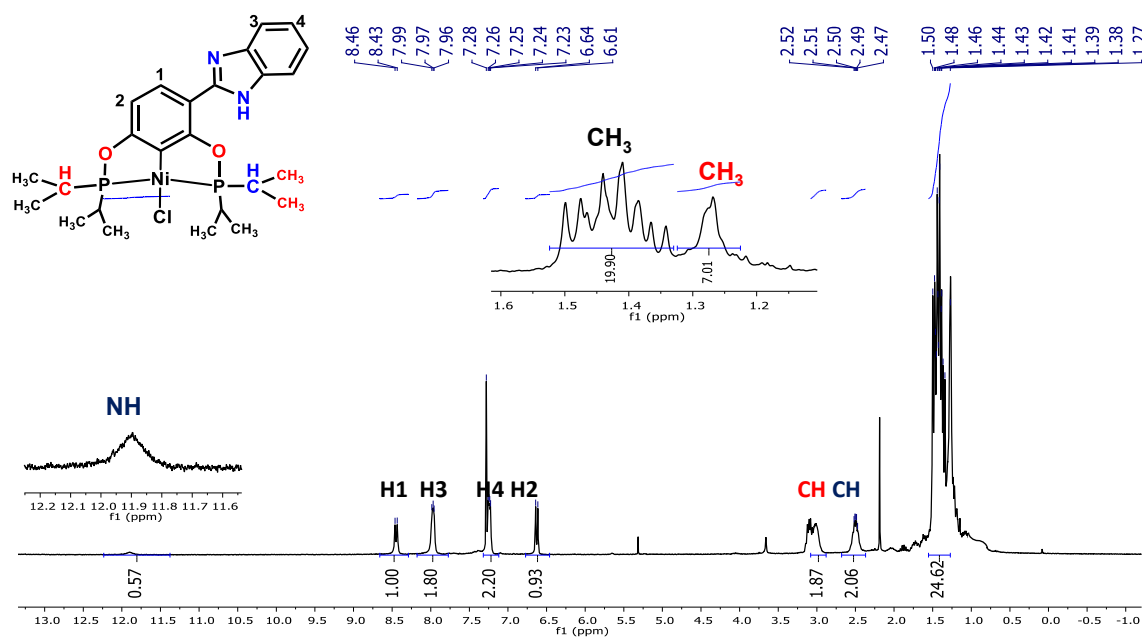

Figure SI15.  $^1\text{H}$  NMR spectrum of **2a**

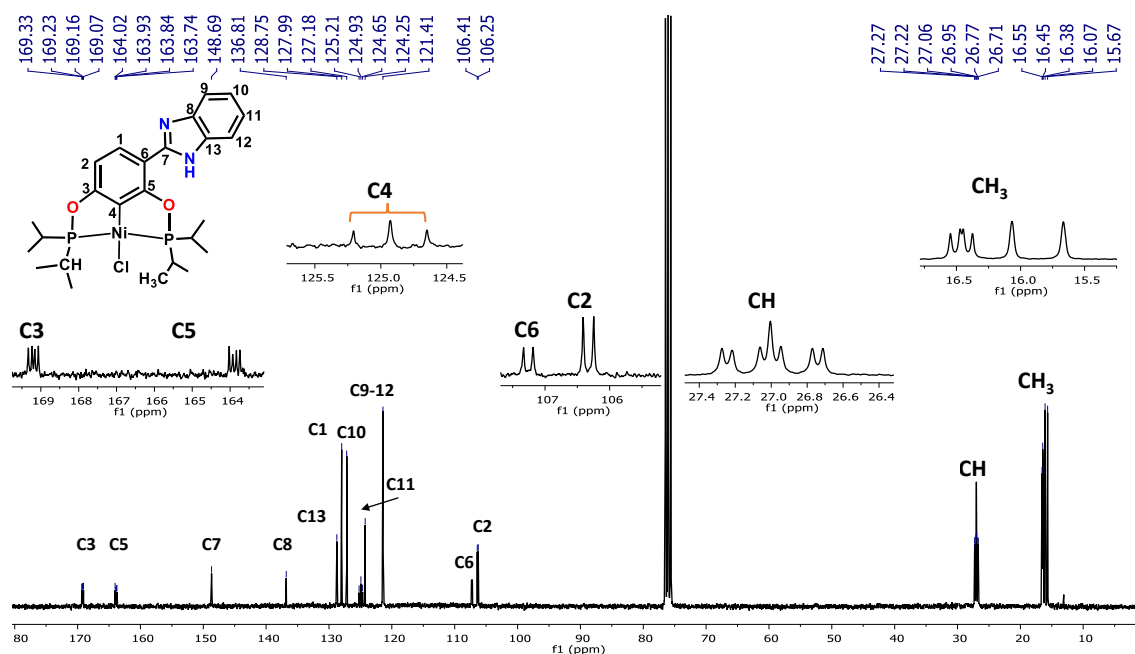

Figure SI16.  $^{13}\text{C}\{^1\text{H}\}$  NMR spectrum of **2a**

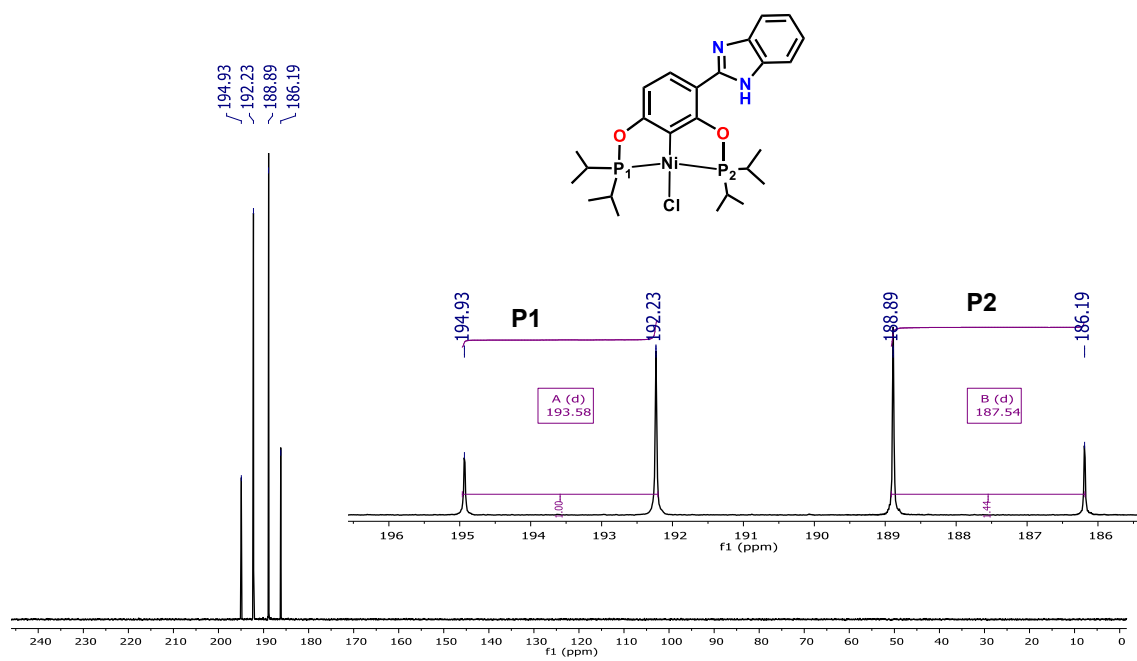

Figure SI17.  $^{31}\text{P}\{^1\text{H}\}$  NMR spectrum of **2a**

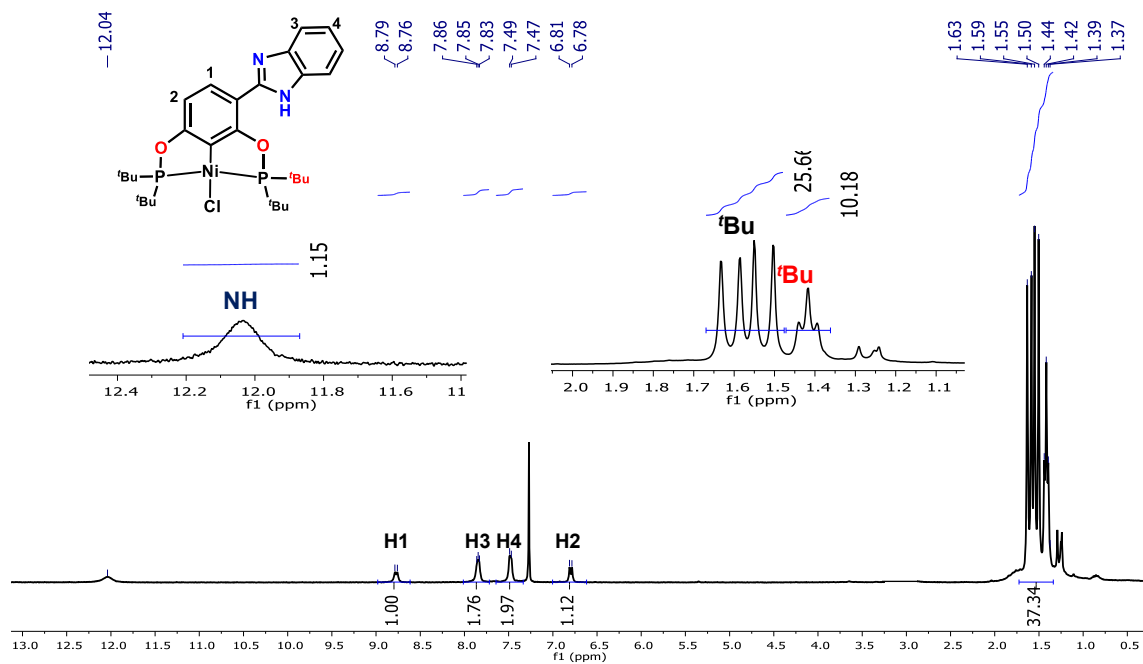

Figure SI18.  $^1\text{H}$  NMR spectrum of **2b**

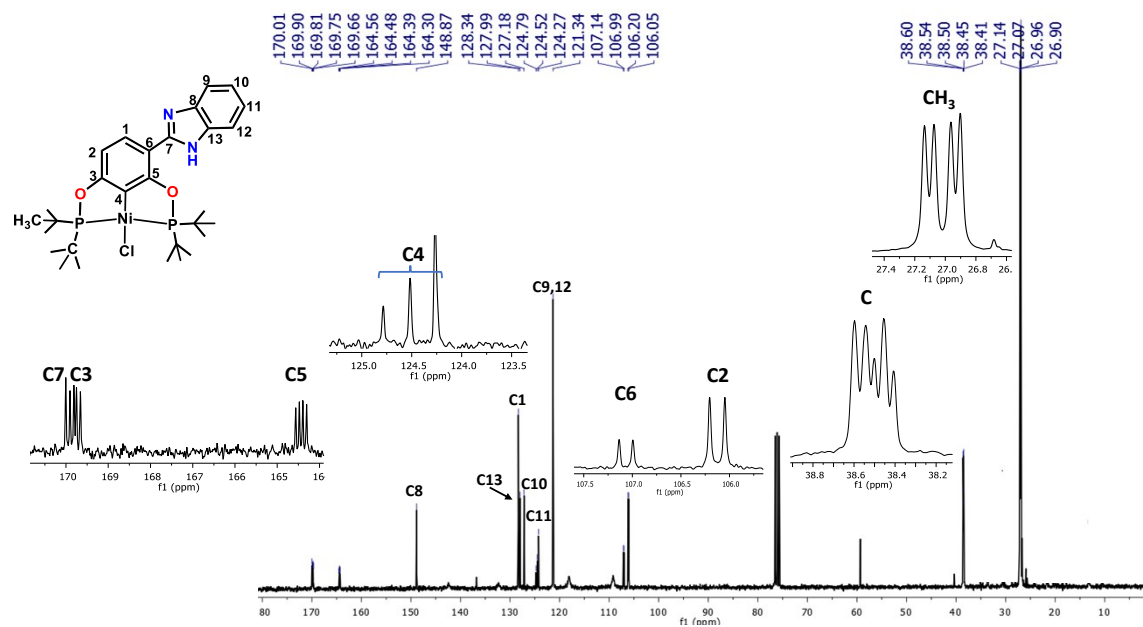

Figure SI19.  $^{31}\text{P}\{^1\text{H}\}$  NMR spectrum of **2b**

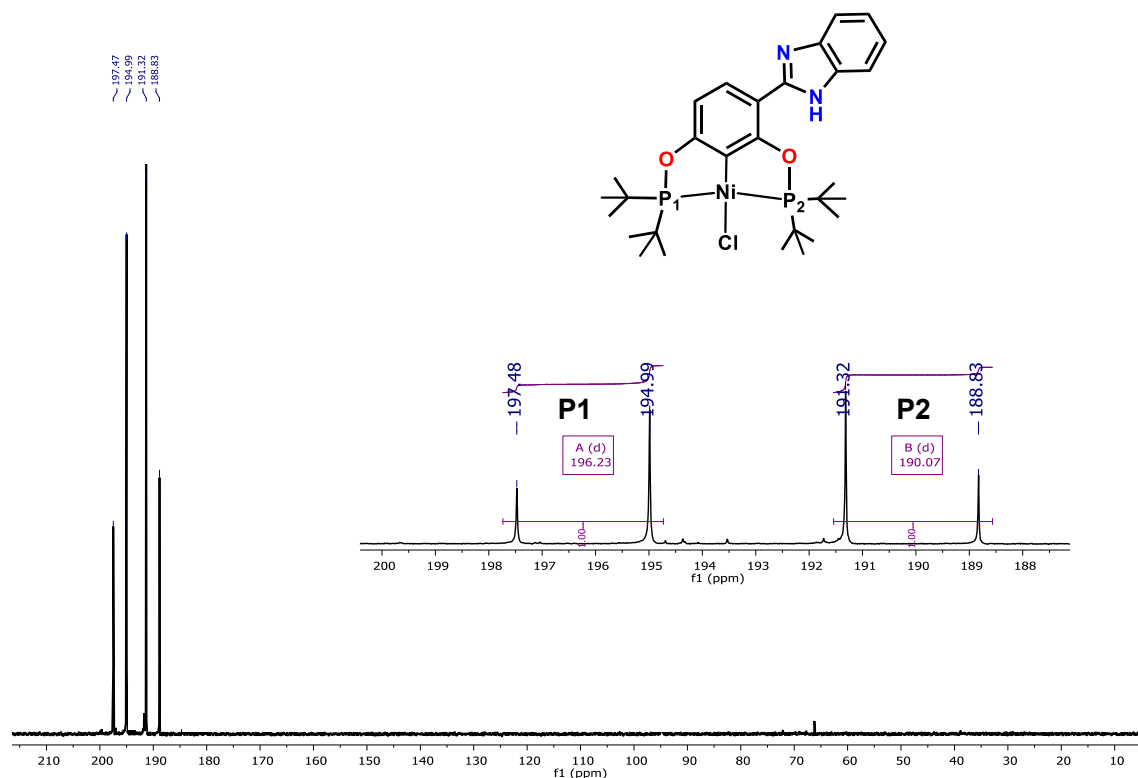

Figure SI20.  $^{31}\text{P}\{^1\text{H}\}$  NMR spectrum of **2b**

### Characterization data for compounds **3a** – **3p**

These compounds were characterized by  $^1\text{H}$  and  $^{13}\text{C}\{^1\text{H}\}$  NMR and structurally confirmed by direct comparison of previously reported data.

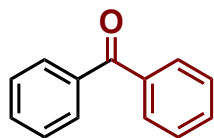

Compound **3a**,  $^1\text{H}$  NMR (300 MHz,  $\text{CDCl}_3$ ):  $\delta$  7.86 (d,  $J$  = 7.7 Hz, 2H), 7.69 (t,  $J$  = 7.5 Hz, 1H), 7.49 (t,  $J$  = 7.6 Hz, 2H).  $^{13}\text{C}\{^1\text{H}\}$  NMR (75.5 MHz,  $\text{CDCl}_3$ ):  $\delta$  196.89, 137.73, 132.54, 130.19, 128.41.<sup>1,4</sup>

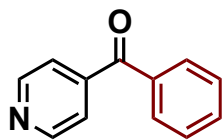

Compound **3b**,  $^1\text{H}$  NMR (300 MHz,  $\text{CDCl}_3$ ):  $\delta$  8.75 (d,  $J$  = 6.0 Hz, 2H), 7.76 (d,  $J$  = 7.2 Hz, 2H), 7.58 (t,  $J$  = 7.60 Hz, 2H), 7.52 (d,  $J$  = 6.0 Hz, 2H), 7.45 (t,  $J$  = 7.6 Hz, 2H).  $^{13}\text{C}\{^1\text{H}\}$  NMR (75.5 MHz,  $\text{CDCl}_3$ ):  $\delta$  194.9, 150.2, 144.2, 135.4, 133.4, 130.0, 128.5, 122.4.<sup>1</sup>

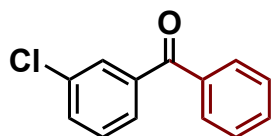

Compound **3c**,  $^1\text{H}$  NMR (300 MHz,  $\text{CDCl}_3$ ):  $\delta$  7.8 – 7.78 (m, 2H), 7.55 (t,  $J$  = 7.4 Hz, 1H), 7.41 (t,  $J$  = 7.6 Hz, 2H), 7.42 – 7.40 (m, 1H), 7.34 – 7.28 (m, 2H), 7.12 – 7.10 (m, 1H), 6.84 (br s, 1H).  $^{13}\text{C}\{^1\text{H}\}$  NMR (75.5 MHz,  $\text{CDCl}_3$ ):  $\delta$  197.5, 156.3, 138.4, 137.4, 132.9, 130.2, 129.6, 128.5, 122.7, 120.3, 116.3.<sup>1</sup>

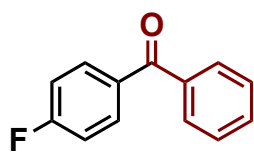

Compound **3d**,  $^1\text{H NMR}$  (300 MHz,  $\text{CDCl}_3$ ):  $\delta$  7.79-7.74 (m, 2H), 7.65 (d,  $J = 7.7$  Hz, 2H), 7.65 (t,  $J = 7.3$  Hz, 1H), 7.47 (t,  $J = 7.5$  Hz, 2H), 7.19 (t,  $J = 8.3$  Hz, 2H).  $^{13}\text{C}\{^1\text{H}\}$  NMR (75.5 MHz,  $\text{CDCl}_3$ ):  $\delta$  195.41, 165.52 (d,  $J_{\text{C-F}} = 252.5$  Hz), 137.63, 133.94, 132.80 (d, Hz), 132.61, 130.01, 128.49, 115.68 (d,  $J_{\text{C-F}} = 21.2$  Hz).<sup>3,4</sup>

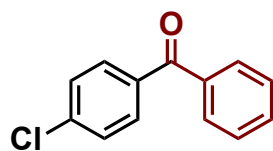

Compound **3e**,  $^1\text{H NMR}$  (300 MHz,  $\text{CDCl}_3$ ):  $\delta$  7.77 (t,  $J = 7.9$  Hz, 4H), 7.60 (t,  $J = 7.3$  Hz, 1H), 7.55-7.42 (m, 4H).  $^{13}\text{C}\{^1\text{H}\}$  NMR (75.5 MHz,  $\text{CDCl}_3$ ):  $\delta$  195.6, 139.0, 137.4, 136.3, 132.8, 131.5, 130.1, 128.9, 128.5.<sup>1,2,4</sup>

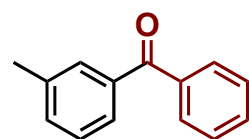

Compound **3f**,  $^1\text{H NMR}$  (300 MHz,  $\text{CDCl}_3$ ):  $\delta$  7.97-7.84 (m, 2H), 7.61-7.58 (m, 1H), 7.48 (t,  $J = 7.7$  Hz, 2H), 7.42 (td,  $J = 7.5, 1.5$  Hz, 1H), 7.34-7.30 (m, 2H), 7.29-7.27 (m, 1H), 2.36 (s, 3H).  $^{13}\text{C}\{^1\text{H}\}$  NMR (75.5 MHz,  $\text{CDCl}_3$ ):  $\delta$  198.77, 138.74, 137.86, 136.87, 133.25, 131.12, 130.36, 130.26, 128.64, 128.58, 125.32, 20.12.<sup>1,4</sup>

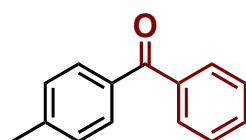

Compound **3g**,  $^1\text{H NMR}$  (300 MHz,  $\text{CDCl}_3$ ):  $\delta$  7.78 (d,  $J = 8.2$  Hz, 2H), 7.73 (d,  $J = 8.2$  Hz, 2H), 7.58 (t,  $J = 7.3$  Hz, 1H), 7.47 (t,  $J = 7.5$  Hz, 2H), 7.28 (d,  $J = 7.9$  Hz, 2H), 2.44 (s, 3H).  $^{13}\text{C}\{^1\text{H}\}$  NMR (75.5 MHz,  $\text{CDCl}_3$ ):  $\delta$  196.5, 143.4, 138.1, 135.0, 132.3, 130.4, 130.1, 129.1, 128.3, 21.8.<sup>1,2,4</sup>

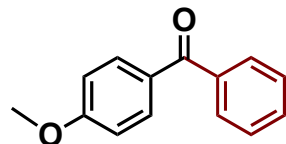

Compound **3h**,  $^1\text{H NMR}$  (300 MHz,  $\text{CDCl}_3$ ):  $\delta$  7.83 (d,  $J = 8.0$  Hz, 2H), 7.76 (d,  $J = 7.6$  Hz, 2H), 7.56 (t,  $J = 7.3$  Hz, 1H), 7.47 (t,  $J = 7.4$  Hz, 2H), 6.97 (d,  $J = 8.0$  Hz, 2H), 3.89 (s, 3H).  $^{13}\text{C}\{^1\text{H}\}$  NMR (75.5 MHz,  $\text{CDCl}_3$ ):  $\delta$  195.6, 163.3, 138.4, 132.7, 132.0, 130.4, 129.7, 128.3, 113.6, 55.5.<sup>1</sup>

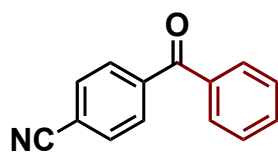

Compound **3i**,  $^1\text{H NMR}$  (300 MHz,  $\text{CDCl}_3$ ):  $\delta$  7.82 (d,  $J = 8.0$  Hz, 2H), 7.71 (d,  $J = 8.4$  Hz, 4H), 7.61 (t,  $J = 7.2$  Hz, 1H), 7.47 (t,  $J = 7.6$  Hz, 2H).  $^{13}\text{C}\{^1\text{H}\}$  NMR (75.5 MHz,  $\text{CDCl}_3$ ):  $\delta$  194.3, 141.1, 136.2, 133.2, 132.4, 130.1, 129.9, 128.1, 117.9, 115.5.<sup>1</sup>

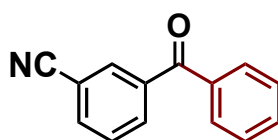

Compound **3j**,  $^1\text{H NMR}$  (300 MHz,  $\text{CDCl}_3$ ):  $\delta$  8.05 (s, 1H), 8.01 (d,  $J = 8.4$  Hz, 1H), 7.85 (d,  $J = 7.6$  Hz, 2H), 7.75 (d,  $J = 7.6$  Hz, 2H), 7.64-7.59 (m, 2H), 7.50 (t,  $J = 7.6$  Hz, 2H).  $^{13}\text{C}\{^1\text{H}\}$  NMR (75.5 MHz,  $\text{CDCl}_3$ ):  $\delta$  193.8, 138.4, 136.0, 135.3, 133.5, 133.2, 133.0, 129.9, 129.4, 128.7, 117.7, 112.6.<sup>1</sup>

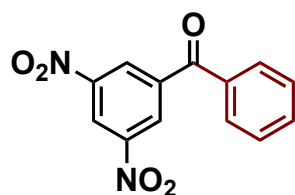

Compound **3k**,  $^1\text{H NMR}$  (300 MHz,  $\text{CDCl}_3$ ):  $\delta$  8.70 (s, 1H), 8.68 (s, 1H), 8.32 (s, 1H), 7.80 (d,  $J = 7.6$  Hz, 2H), 7.63 (t,  $J = 7.6$  Hz, 1H), 7.50 (t,  $J = 7.6$  Hz, 2H).  $^{13}\text{C}\{^1\text{H}\}$  NMR (75.5 MHz,  $\text{CDCl}_3$ ):  $\delta$  194.8, 149.8, 142.8, 139.8, 136.3, 130.7, 130.1, 128.7, 123.5.

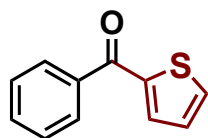

Compound **3l**,  $^1\text{H}$  NMR (300 MHz,  $\text{CDCl}_3$ ):  $\delta$  7.80 (d,  $J = 7.2$  Hz, 2H), 7.67 (d,  $J = 5.2$  Hz, 1H), 7.62 (d,  $J = 3.6$  Hz, 1H), 7.55 (t,  $J = 7.2$  Hz, 1H), 7.37 (t,  $J = 7.6$  Hz, 2H), 7.14 (t,  $J = 4.4$  Hz, 1H).  $^{13}\text{C}\{^1\text{H}\}$  NMR (75.5 MHz,  $\text{CDCl}_3$ ):  $\delta$  188.1, 143.6, 138.4, 135.0, 134.1, 132.4, 129.1, 128.0, 127.7.<sup>1,2,3</sup>

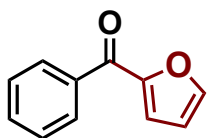

Compound **3m**,  $^1\text{H}$  NMR (300 MHz,  $\text{CDCl}_3$ ):  $\delta$  7.95 – 7.92 (m, 2H), 7.70 – 7.68 (m, 1H), 7.61 – 7.59 (m, 1H), 7.49 (t,  $J = 7.5$  Hz, 2H), 7.23 (d,  $J = 3.5$  Hz, 1H), 6.59 (dd,  $J = 3.5, 1.6$  Hz, 1H).  $^{13}\text{C}\{^1\text{H}\}$  NMR (75.5 MHz,  $\text{CDCl}_3$ ):  $\delta$  182.7, 151.9, 147.2, 137.0, 132.7, 129.8, 128.9, 120.7, 112.0.<sup>1,2,3</sup>

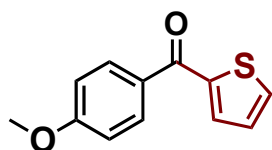

Compound **3n**,  $^1\text{H}$  NMR (300 MHz,  $\text{CDCl}_3$ ):  $\delta$  7.99 (d,  $J = 8.9$ , 2H), 7.67 (d,  $J = 4.9$  Hz, 1H), 7.59 (d,  $J = 4.1$  Hz, 1H), 7.10 – 7.08 (m, 1H), 6.91 (d,  $J = 8.9$  Hz, 2H), 3.85 (s, 3H).  $^{13}\text{C}\{^1\text{H}\}$  NMR (75.5 MHz,  $\text{CDCl}_3$ ):  $\delta$  187.1, 163.0, 143.8, 134.0, 133.1, 131.5, 130.8, 127.7, 113.5, 55.3.<sup>1,2,3</sup>

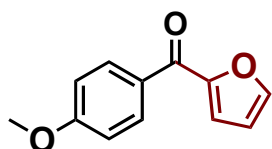

Compound **3o**,  $^1\text{H}$  NMR (300 MHz,  $\text{CDCl}_3$ ):  $\delta$  8.0 (d,  $J = 8.9$ , 2H), 7.68 (d,  $J = 0.7$  Hz, 1H), 7.22 (d,  $J = 3.5$  Hz, 1H), 6.98 (d,  $J = 8.9$  Hz, 2H), 6.59-6.57 (m, 1H), 3.88 (s, 3H);  $^{13}\text{C}\{^1\text{H}\}$  NMR (75.5 MHz,  $\text{CDCl}_3$ ):  $\delta$  181.0, 163.2, 152.5, 146.5, 131.6, 129.7, 119.6, 113.6, 112.0, 55.4.<sup>1,2,3</sup>

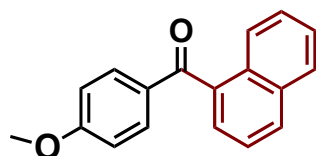

Compound **3p**,  $^1\text{H}$  NMR (300 MHz,  $\text{CDCl}_3$ ):  $\delta$  7.97 (t,  $J = 8.2$  Hz, 2H), 7.90 (d,  $J = 8.0$  Hz, 1H), 7.85 (d,  $J = 8.2$  Hz, 2H), 7.58 – 7.41 (m, 4H), 6.92 (d,  $J = 8.6$  Hz, 2H), 3.87 (s, 3H).  $^{13}\text{C}\{^1\text{H}\}$  NMR (75.5 MHz,  $\text{CDCl}_3$ ):  $\delta$  196.5, 163.5, 136.7, 133.5, 132.2, 130.9, 130.6, 130.5, 128.2, 126.8, 126.7, 126.1, 125.4, 124.2, 113.5, 55.3.<sup>2</sup>

[1] J. Karthikeyan, K. Parthasarathy and C.-H. Cheng, *Chem. Commun.*, 2011, **47**, 10461-10463.

[2] G. Mora, S. Darses and J.-P. Genet, *Advanced Synthesis & Catalysis*, 2007, **349**, 1180-1184.

[3] M. Pucheault, S. Darses and J.-P. Genet, *J. Am. Chem. Soc.*, 2004, **126**, 15356-15357.

[4] S. Shi and M. Szostak, *Org. Lett.*, 2016, **18**, 5872-5875.
